# Supplementary material for: Polyaromatic hydrocarbon concentrations and patterns in sediments and surface water of the Mansfeld region, Saxony-Anhalt, Germany.
Source: Royal Society of Chemistry journal article supplement (doi:10.1039/b104707h), 2001-10-29
Supplement: definition.doc [file definition.doc]

# Electronic Supplementary Information

## Definition of fugacity quotients

The fugacity (*f*) within a particular compartment is defined as the concentration of chemical in that compartment (*C*) divided by the fugacity capacity (*Z*) of that compartment[[1]](#endnote-2), i.e.

(1)

and

(2)

where the indices *w* and *s* stand for water and sediment, respectively. The fugacity capacity of the water (*Zw*) and sediment (*ZS*) can be calculated using

(3)

and

(4)

where *H*W is the Henry´s law constant,

The combination of equations (1) to (4) gives the fugacity quotient

(5)

where *CWM* and *C*WS are the concentrations of the analyte in water estimated from SPMD and sediment data, respectively.

# Reference:

1. D. Mackay, *Environ. Sci. Technol.*, 1979, 13, 1218. [↑](#endnote-ref-2)
